# Supplementary material for: Insight into the Formation of Cocrystal and Salt of Tenoxicam from the Isomer and Conformation
Source: MDPI journal article supplement (doi:10.3390/pharmaceutics14091968), 2022-09-19
Supplement: s1 [file s1]

**Table S1.** GSK-EDA of the cocrystal TNX-PAS (kcal/mol).

| Pair              | $\Delta E^{\text{ele}}$ | $\Delta E^{\text{ex}}$ | $\Delta E^{\text{rep}}$ | $\Delta E^{\text{pol}}$ | $\Delta E^{\text{disp}}$ | $\Delta E$    |
|-------------------|-------------------------|------------------------|-------------------------|-------------------------|--------------------------|---------------|
| Pair 1,2          | -24.20                  | -31.69                 | 57.78                   | -14.89                  | -3.11                    | -16.11        |
| Pair 1,3          | -33.94                  | -30.49                 | 51.98                   | -14.57                  | -7.56                    | -34.58        |
| Pair 1,4          | 0.58                    | 0.00                   | 0.00                    | 0.13                    | -0.14                    | 0.57          |
| Pair 2,3          | 0.59                    | 0.00                   | 0.00                    | 0.13                    | -0.14                    | 0.58          |
| Pair 2,4          | -0.02                   | 0.00                   | 0.00                    | -0.01                   | 0.01                     | -0.02         |
| Pair 3,4          | -25.02                  | -33.25                 | 60.9                    | -15.81                  | -3.04                    | -16.23        |
| Pairwise sum      | -82.01                  | -95.43                 | 170.66                  | -45.02                  | -13.98                   | -65.79        |
| Total interaction | -81.78                  | -95.33                 | 170.48                  | -42.28                  | -14.36                   | <b>-63.26</b> |
| Many-body effects | 0.23                    | 0.10                   | -0.18                   | 2.74                    | -0.38                    | 2.53          |

**Table S2.** GSK-EDA of the cocrystal TNX-DNB (kcal/mol).

| Pair              | $\Delta E^{\text{ele}}$ | $\Delta E^{\text{ex}}$ | $\Delta E^{\text{rep}}$ | $\Delta E^{\text{pol}}$ | $\Delta E^{\text{disp}}$ | $\Delta E$    |
|-------------------|-------------------------|------------------------|-------------------------|-------------------------|--------------------------|---------------|
| Pair 1,2          | -31.54                  | -28.17                 | 47.63                   | -13.64                  | -7.18                    | -32.89        |
| Pair 1,3          | -28.48                  | -36.29                 | 66.31                   | -18.12                  | -3.97                    | -20.54        |
| Pair 1,4          | 0.68                    | 0.00                   | 0.00                    | 0.09                    | -0.11                    | 0.67          |
| Pair 2,3          | 0.68                    | 0.00                   | 0.00                    | 0.09                    | -0.11                    | 0.66          |
| Pair 2,4          | -28.49                  | -36.29                 | 66.33                   | -18.14                  | -3.96                    | -20.57        |
| Pair 3,4          | -0.01                   | 0.00                   | 0.00                    | 0.00                    | 0.00                     | -0.01         |
| Pairwise sum      | -87.16                  | -100.75                | 180.27                  | -49.72                  | -15.33                   | -72.68        |
| Total interaction | -86.9                   | -100.65                | 180.11                  | -46.46                  | -15.73                   | <b>-69.64</b> |
| Many-body effects | 0.26                    | 0.10                   | -0.16                   | 3.26                    | -0.40                    | 3.04          |

**Table S3.** GSK-EDA of the salt TNX-DHB (kcal/mol).

| Pair              | $\Delta E^{\text{ele}}$ | $\Delta E^{\text{ex}}$ | $\Delta E^{\text{rep}}$ | $\Delta E^{\text{pol}}$ | $\Delta E^{\text{disp}}$ | $\Delta E$     |
|-------------------|-------------------------|------------------------|-------------------------|-------------------------|--------------------------|----------------|
| Pair 1,2          | -115.84                 | -65.95                 | 121                     | -49.03                  | -8.45                    | -118.26        |
| Pair 1,3          | 28.23                   | -11.53                 | 19.83                   | -4.94                   | -4.44                    | 27.16          |
| Pair 1,4          | -26.4                   | 0                      | 0                       | -0.47                   | 0.1                      | -26.78         |
| Pair 2,3          | -26.41                  | 0                      | 0                       | -0.48                   | 0.1                      | -26.78         |
| Pair 2,4          | 20.75                   | 0                      | 0                       | 0.47                    | -0.53                    | 20.69          |
| Pair 3,4          | -115.8                  | -65.87                 | 120.84                  | -48.98                  | -8.45                    | -118.27        |
| Pairwise sum      | -235.47                 | -143.35                | 261.67                  | -103.43                 | -21.67                   | -242.24        |
| Total interaction | -235.71                 | -143.3                 | 261.72                  | -102.64                 | -22.42                   | <b>-242.34</b> |
| Many-body effects | -0.24                   | 0.05                   | 0.05                    | 0.79                    | -0.75                    | -0.1           |

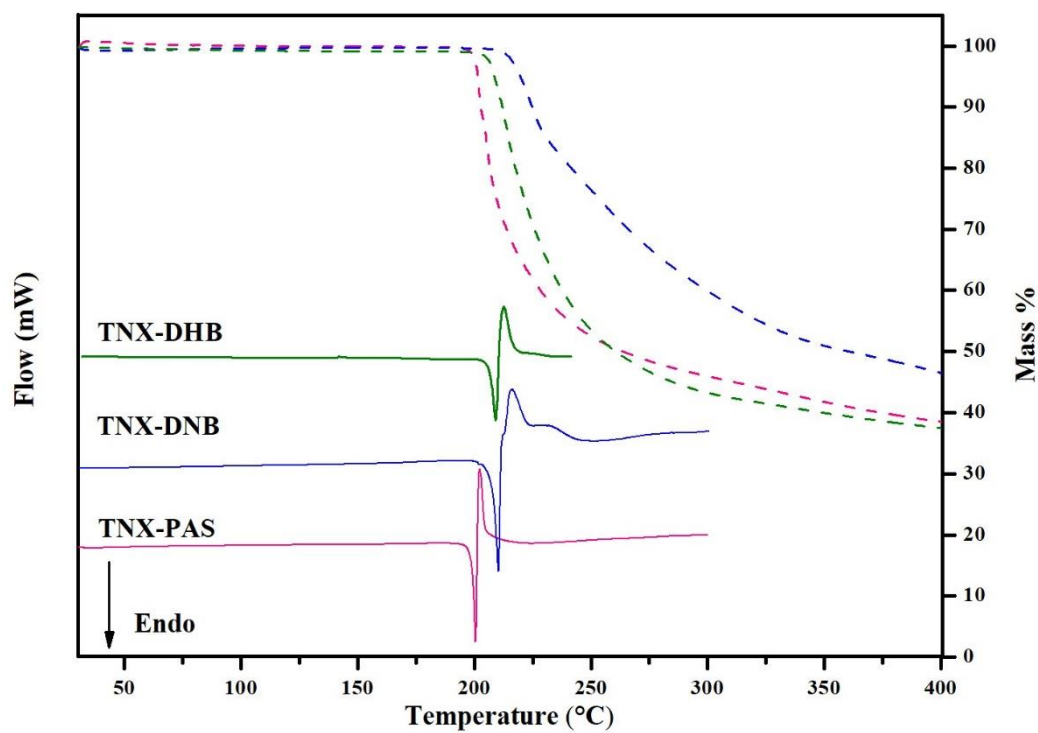

Figure S1. DSC and TG profiles of TNX, CCFs and the corresponding cocrystals/salt.
